# Supplementary material for: No tropospheric ozone impact on the carbon uptake by a Belgian pine forest
Source: Copernicus journal article supplement (doi:10.5194/bg-2016-12), 2016-02-23
Supplement: Supplementary file 1 [file bg-2016-12-supplement.pdf]

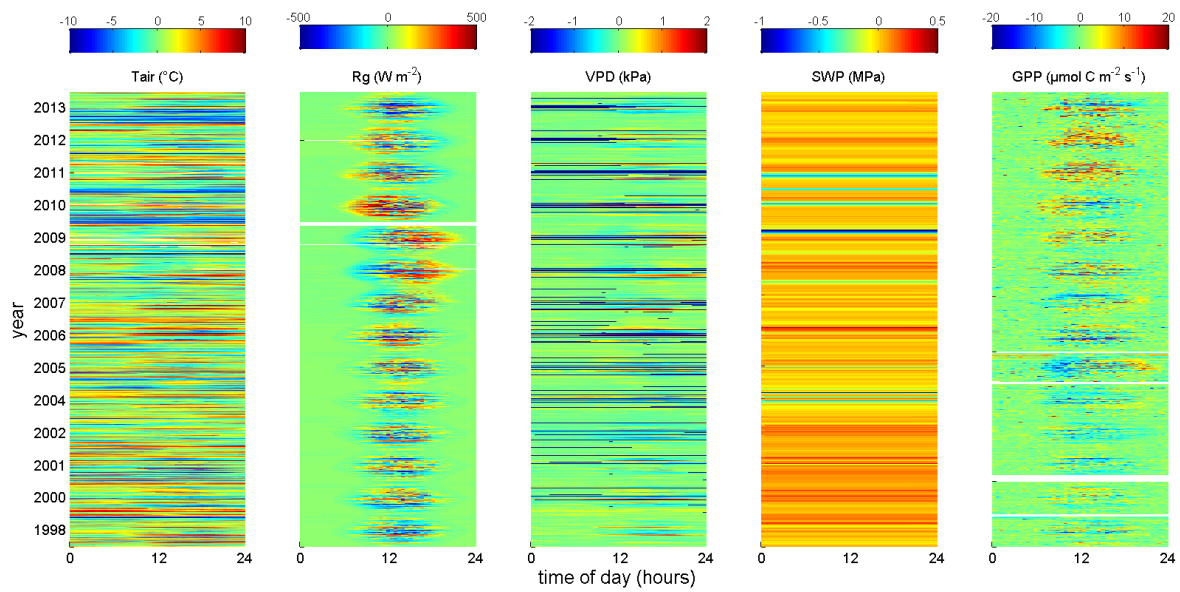

Fig. S1. Fingerprint of annual anomalies of the meteorological, soil water, and carbon exchange measurements compared to the averaged values shown in Fig. 1 and 2 of the main text. For each day of the year air temperature (Tair), incoming global radiation (Rg), vapour pressure deficit (VPD), soil water potential (SWP), and gross primary productivity (GPP) are plotted in function of time of the day.

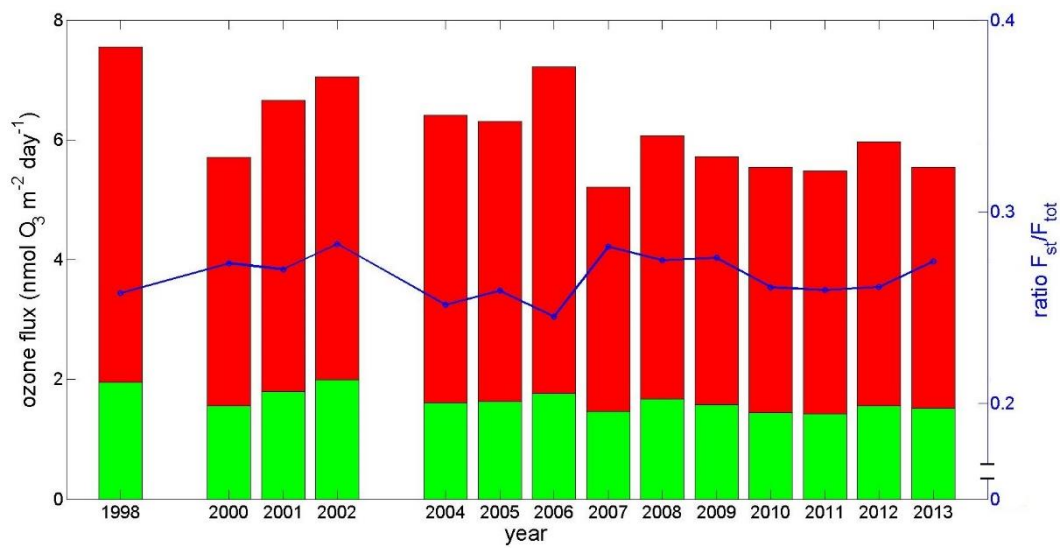

Fig. S2. Average daily  $O_3$  flux during the growing season and ratio of stomatal versus total ozone flux ( $F_{st}/F_{tot}$ ) for each year. The height of the bars represents the average total  $O_3$  flux. The green part of the bar is the stomatal  $O_3$  flux, whereas the red part is the non-stomatal  $O_3$  flux. The ratio  $F_{st}/F_{tot}$  is represented by the blue line.
